# Supplementary material for: Self-Cleaning Cotton Obtained after Grafting Thermoresponsive Poly(N-vinylcaprolactam) through Surface-Initiated Atom Transfer Radical Polymerization
Source: PubMed Central journal article supplement (PMC7762131; doi:10.3390/polym12122920), 2020-12-05
Supplement: polymers-12-02920-s001.pdf [file polymers-12-02920-s001.pdf]

Article

# Self-Cleaning Cotton Obtained After Grafting Thermoresponsive Poly(*N*-vinylcaprolactam) Through Surface-Initiated Atom Transfer Radical Polymerization

Bhaskarchand Gautam<sup>1,2,3</sup> and Hsiao-hua Yu<sup>1,3,4\*</sup>

<sup>1</sup> Smart Organic Material Laboratory, Institute of Chemistry, Academia Sinica, Nankang, 128 Academia Road, Sec. 2, Taipei 115, Taiwan.

<sup>2</sup> Taiwan International Graduate Program (TIGP), Sustainable Chemical Science and Technology (SCST), Academia Sinica, Taipei 115, Taiwan

<sup>3</sup> Department of Applied Chemistry, National Chiao Tung University, Hsinchu, Taiwan

<sup>4</sup> Institute of Chemistry, Chemistry, Academia Sinica, Nankang, 128 Academia Road, Sec.2, Taipei 115, Taiwan

\* Correspondence: bruceyu@gate.sinica.edu.tw; Tel.: +886-2-55728634

Received: date; Accepted: date; Published: date

## Supplementary Materials:

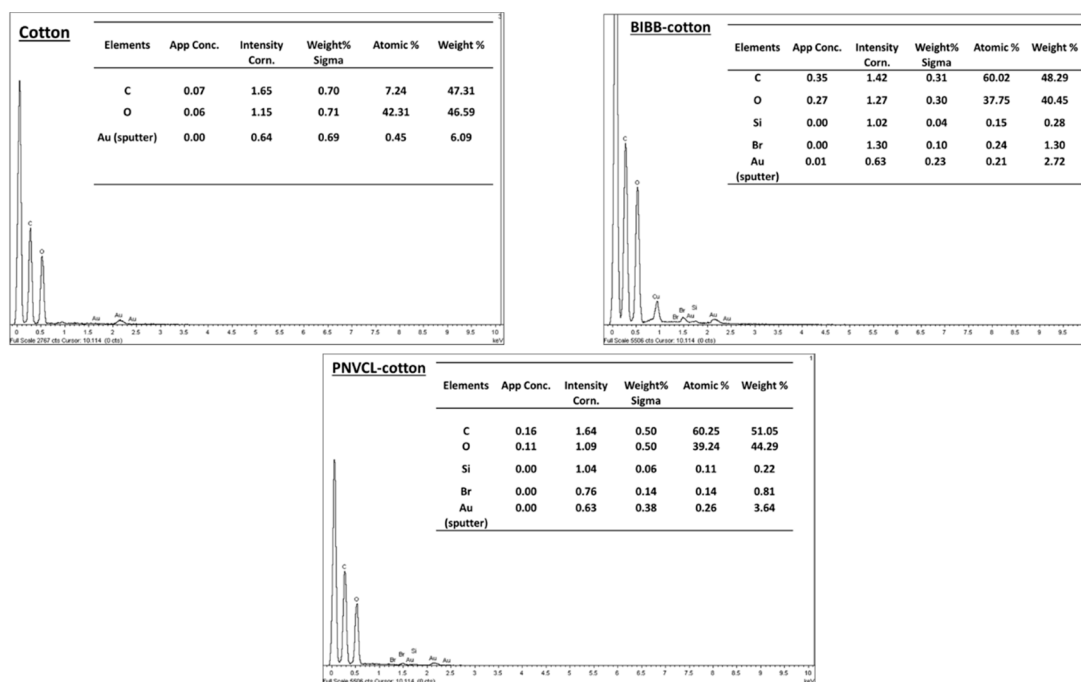

Figure S1. EDS spectra and elemental measurements of the Cotton, Cotton-BiBB and Cotton-PNVCL fabrics.

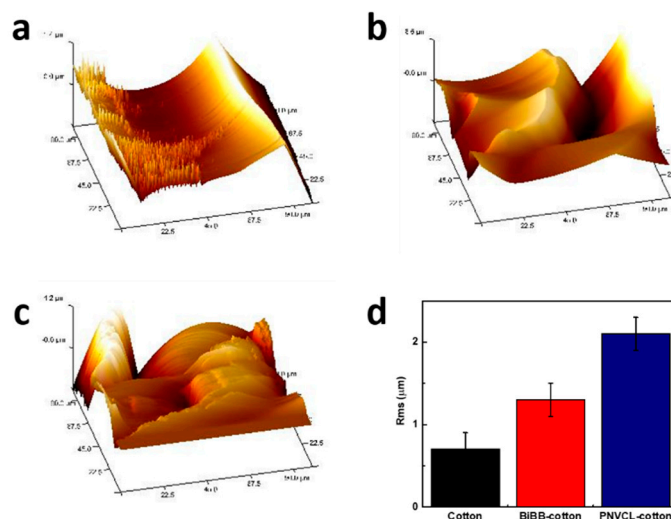

**Figure S2.** (a–c) AFM images of the (a) Cotton, (b) Cotton-BiBB, and (c) Cotton-PNVCL fabrics. (d) Quantitative roughness analysis of each of the fabrics.

| Polymerization time (H) | Before polymerization (Wa) | After polymerization (Wb) | Amount of polymer grafted (Wb-Wa) | Grafting yield (%) | Average | Standard deviation |
|-------------------------|----------------------------|---------------------------|-----------------------------------|--------------------|---------|--------------------|
| 2                       | 0.3                        | 0.33                      | 0.03                              | 9.1                | 9.5     | 1.2                |
|                         | 0.32                       | 0.35                      | 0.03                              | 8.6                |         |                    |
|                         | 0.33                       | 0.37                      | 0.04                              | 10.8               |         |                    |
| 4                       | 0.27                       | 0.31                      | 0.04                              | 12.9               | 12.0    | 1.5                |
|                         | 0.35                       | 0.39                      | 0.04                              | 10.3               |         |                    |
|                         | 0.34                       | 0.39                      | 0.05                              | 12.8               |         |                    |
| 6                       | 0.35                       | 0.42                      | 0.07                              | 16.7               | 17.0    | 1.0                |
|                         | 0.36                       | 0.44                      | 0.08                              | 18.2               |         |                    |
|                         | 0.36                       | 0.43                      | 0.07                              | 16.3               |         |                    |
| 8                       | 0.34                       | 0.45                      | 0.11                              | 24.4               | 25.2    | 0.9                |
|                         | 0.3                        | 0.4                       | 0.1                               | 25.0               |         |                    |
|                         | 0.31                       | 0.42                      | 0.11                              | 26.2               |         |                    |
| 10                      | 0.29                       | 0.43                      | 0.14                              | 32.6               | 32.6    | 0.7                |
|                         | 0.32                       | 0.47                      | 0.15                              | 31.9               |         |                    |
|                         | 0.3                        | 0.45                      | 0.15                              | 33.3               |         |                    |
| 12                      | 0.25                       | 0.41                      | 0.16                              | 39.0               | 37.1    | 3.8                |
|                         | 0.32                       | 0.53                      | 0.21                              | 39.6               |         |                    |
|                         | 0.35                       | 0.52                      | 0.17                              | 32.7               |         |                    |
| 14                      | 0.32                       | 0.53                      | 0.21                              | 39.6               | 37.8    | 3.9                |
|                         | 0.34                       | 0.57                      | 0.23                              | 40.4               |         |                    |
|                         | 0.36                       | 0.54                      | 0.18                              | 33.3               |         |                    |
| 16                      | 0.36                       | 0.62                      | 0.26                              | 41.9               | 39.1    | 3.8                |
|                         | 0.35                       | 0.59                      | 0.24                              | 40.7               |         |                    |
|                         | 0.3                        | 0.46                      | 0.16                              | 34.8               |         |                    |

**Figure S3.** Quantitative data for grafting yield analysis used to plot figure 2a.

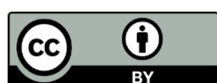

© 2020 by the authors. Submitted for possible open access publication under the terms and conditions of the Creative Commons Attribution (CC BY) license (<http://creativecommons.org/licenses/by/4.0/>).
